# Supplementary material
Source: PubMed Central journal article supplement (PMC3791269)
Supplement: mmc1.pdf [file mmc1.pdf]

**American Journal of Human Genetics, Volume 93**

**Supplemental Information**

**Identification of Small Exonic CNV**

**from Whole-Exome Sequence Data**

**and Application to Autism Spectrum Disorder**

**Christopher S. Poultney, Arthur P. Goldberg, Elodie Drapeau, Yan Kou,  
Hala Harony-Nicolas, Yuji Kajiwara, Silvia De Rubeis, Simon Durand, Christine Stevens,  
Karola Rehnström, Aarno Palotie, Mark J. Daly, Avi Ma'ayan, Menachem Fromer,  
and Joseph D. Buxbaum**

**Supplemental Inventory**

**Supplemental Figures and Tables**

Figure S1

Figure S2

Figure S3

Figure S4

Figure S5

Figure S6

Table S1

Table S2

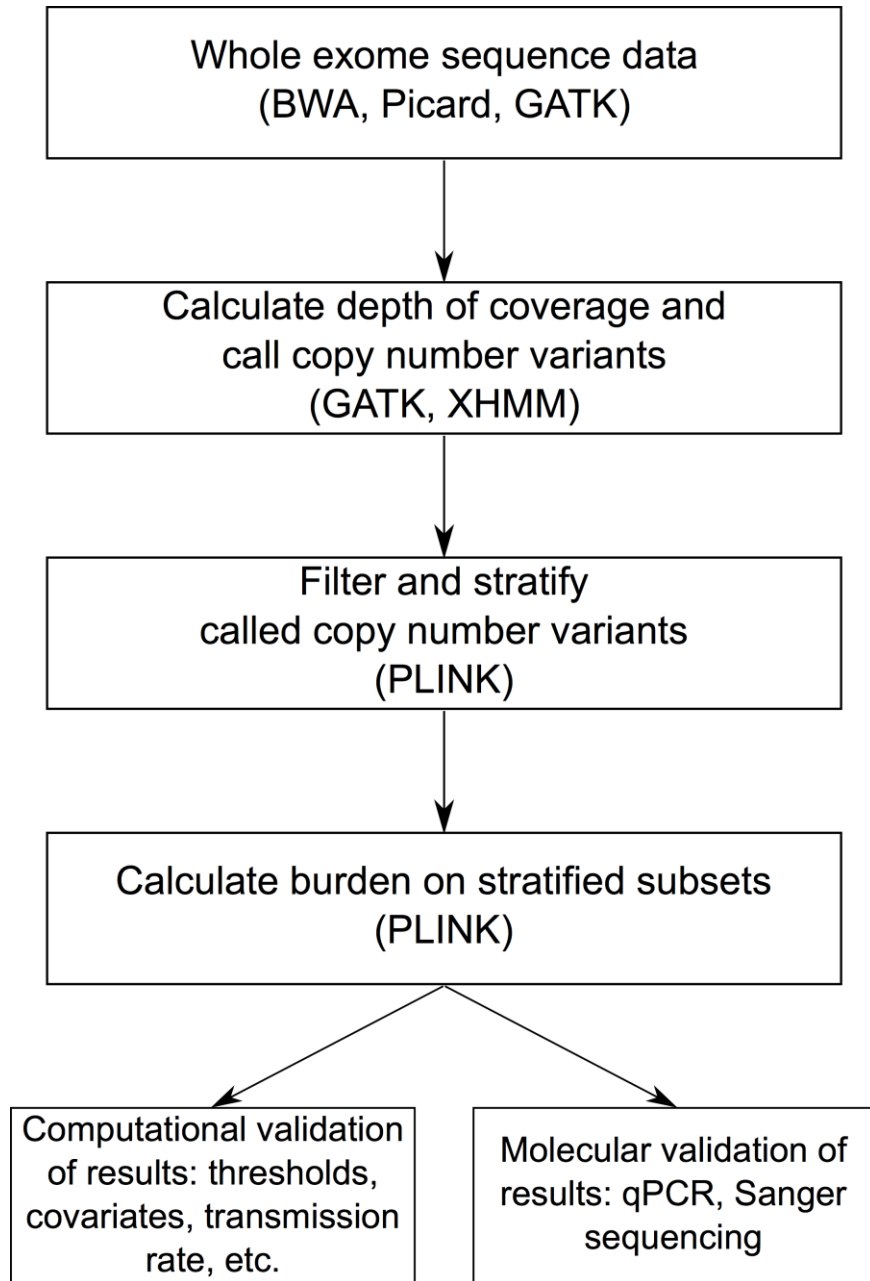

**Figure S1. Processing and Validation Pipeline for Calling Small (1-30 kb) CNV from Whole Exome Sequencing Data**

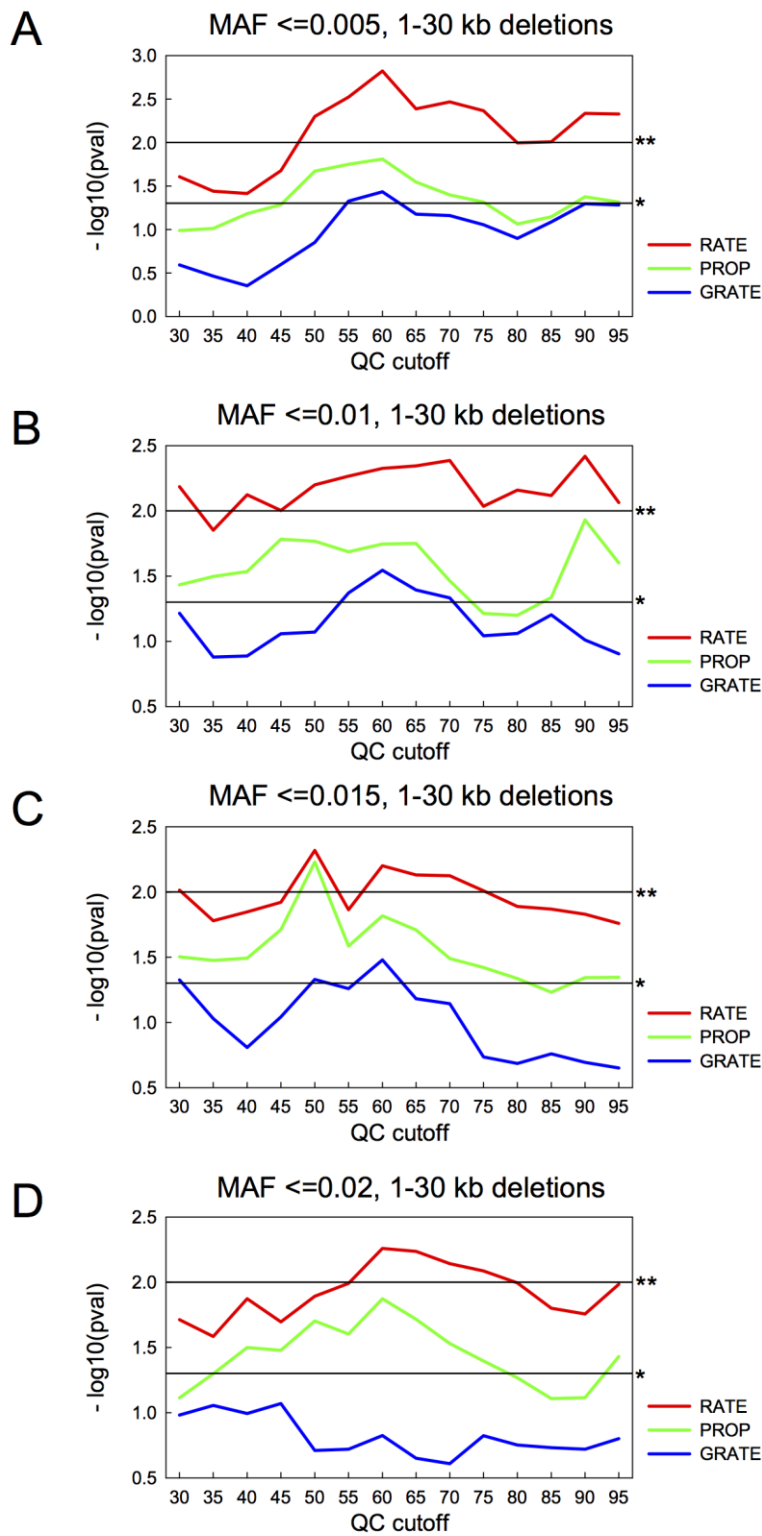

**Figure S2. Computational Validation of SQ and MAF Cutoffs**

Each panel shows P-values for the three burden tests across SQ values for MAF  $\leq 0.005$  (A), 0.01 (B), 0.015 (C), and 0.02 (D).

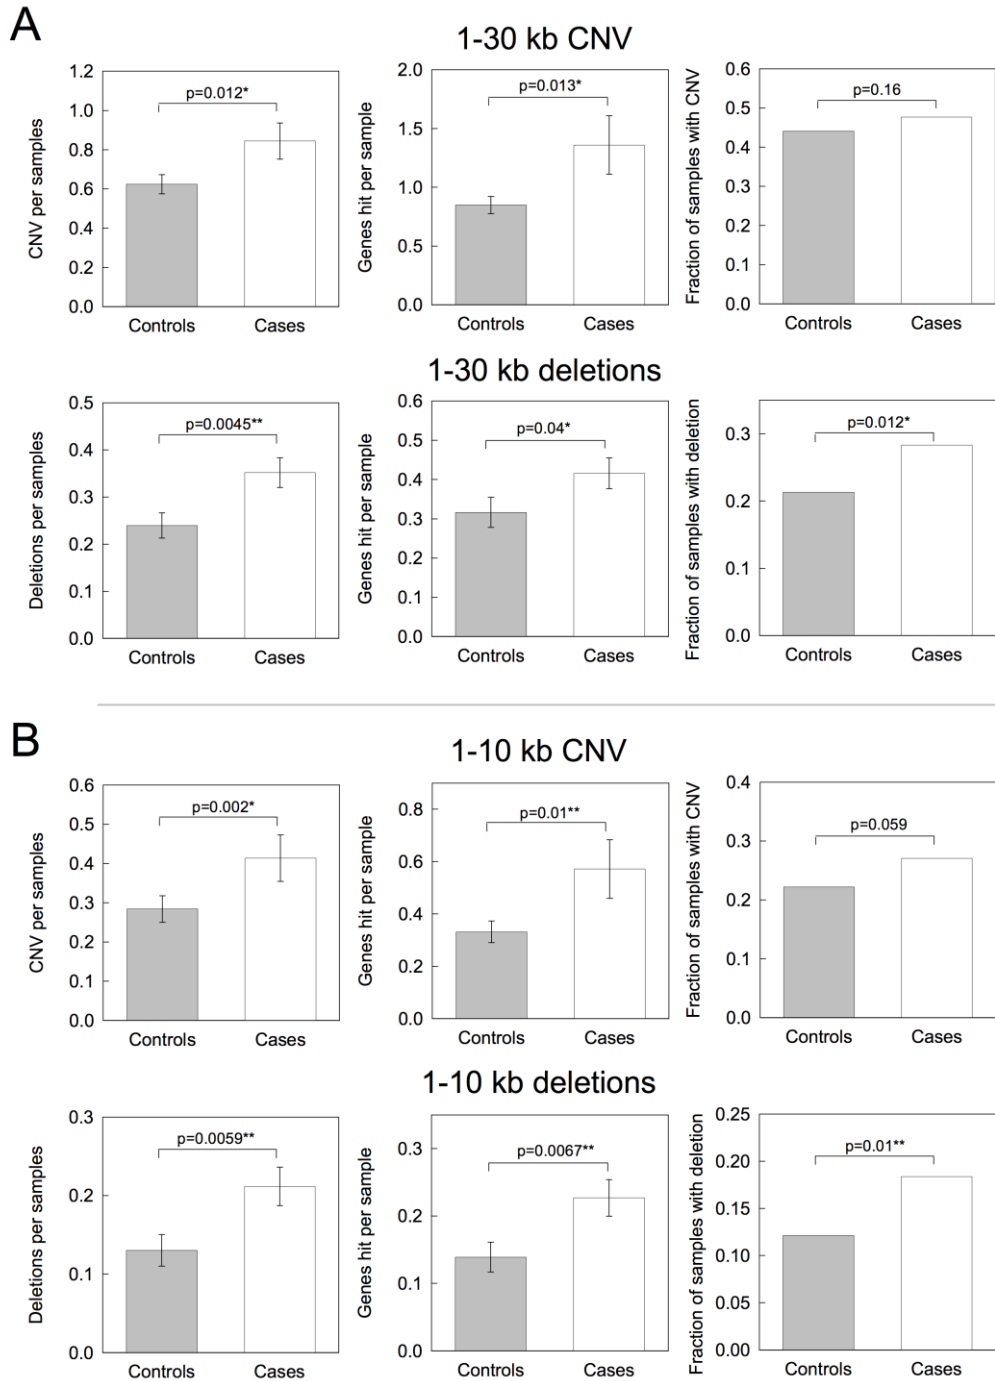

**Figure S3. Enrichment for Small Deletions in ASD, with Explicit Handling of Read Depth and Processing Batch**

To account for the bimodal distribution of sample mean read depth, clusters of samples with similar mean read depth were determined based on processing batch and read depth distribution. Burden tests were then performed, generating p-values derived using within-cluster permutation. As in Figure 2, panel A shows burden test results for all CNV (top) and deletions (bottom) in the 1-30 kb range, and panel B shows the same for the 1-10 kb range. Burden test results using within-cluster permutation are very similar to results derived without clustering.

1-30 kb deletions

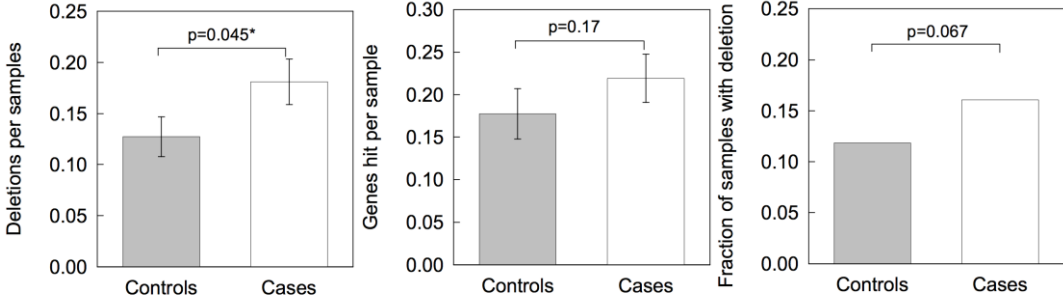

Figure S4. Enrichment for Small (1-30 kb) Deletions in Singleton CNV in ASD

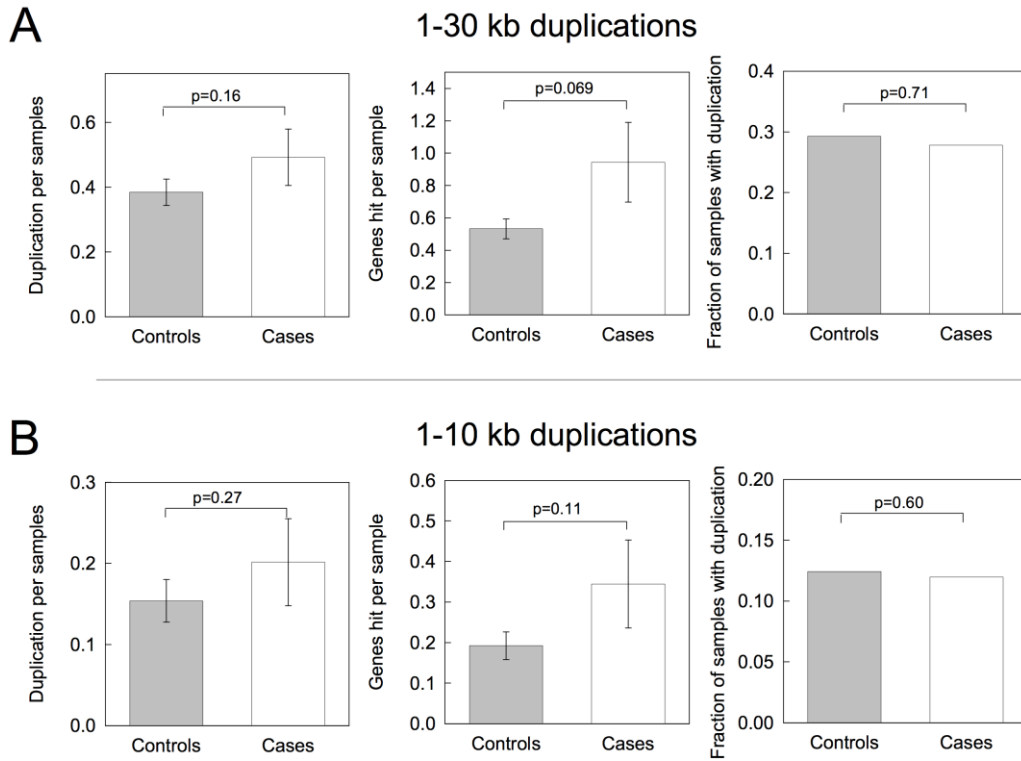

**Figure S5. Lack of Significant Enrichment in Small (1-30 kb) Duplications in ASD**

While there are nominal increases in duplications per sample and genes hit per sample, these changes were not significant. This is, however, possibly a power issue.

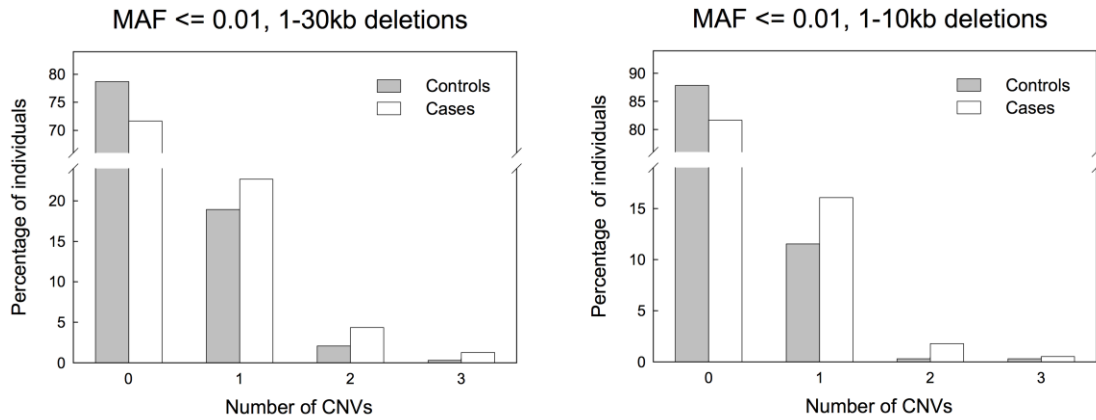

**Figure S6. Distribution of Small Deletions**

Percent of individuals is shown as a function of number of events for 1-30 kb deletions (left) and 1-10 kb deletions (right). The ratio of the rates between case and control differs significantly from one using a two-sided test at  $P=0.0066$  (1-30 kb deletions) and  $P=0.0096$  (1-10 kb deletions).

**Table S1. XHMM Runtime Arguments**

| <b>Argument</b> | <b>Value</b> |
|-----------------|--------------|
| minTargetSize   | 10           |
| maxTargetSize   | 10000        |
| minMeanTargetRD | 10           |
| maxMeanTargetRD | 500          |
| minMeanSampleRD | 25           |
| maxMeanSampleRD | 250          |
| maxSdSampleRD   | 168          |
| maxSdTargetRD   | 30           |
| PVE_mean_factor | 0.7          |

**Table S2. XHMM Parameter File Values Used for Genotyping Stage**

| <b>Parameter</b>                     | <b>Value</b>       |
|--------------------------------------|--------------------|
| Pr(start DEL) = Pr(start DUP)        | 1e-08              |
| Mean number of targets in CNV        | 6                  |
| Mean distance between targets in CNV | 70 kb              |
| DEL read depth distribution          | ~N(mean=-3, var=1) |
| DIP read depth distribution          | ~N(mean=0, var=1)  |
| DUP read depth distribution          | ~N(mean=3, var=1)  |
